# Supplementary material for: Phosphoproteome Microarray Analysis of Extracellular Particles as a Tool to Explore Novel Biomarker Candidates for Alzheimer’s Disease
Source: MDPI journal article supplement (doi:10.3390/ijms25031584), 2024-01-27
Supplement: s1 [file s1]

**Manuscript: Phosphoproteome Microarray Analysis of Extracellular Particles  
as a Tool to Explore Novel Biomarker Candidates for Alzheimer’s Disease**

**Supplementary Materials**

**Supplementary Figure S1**

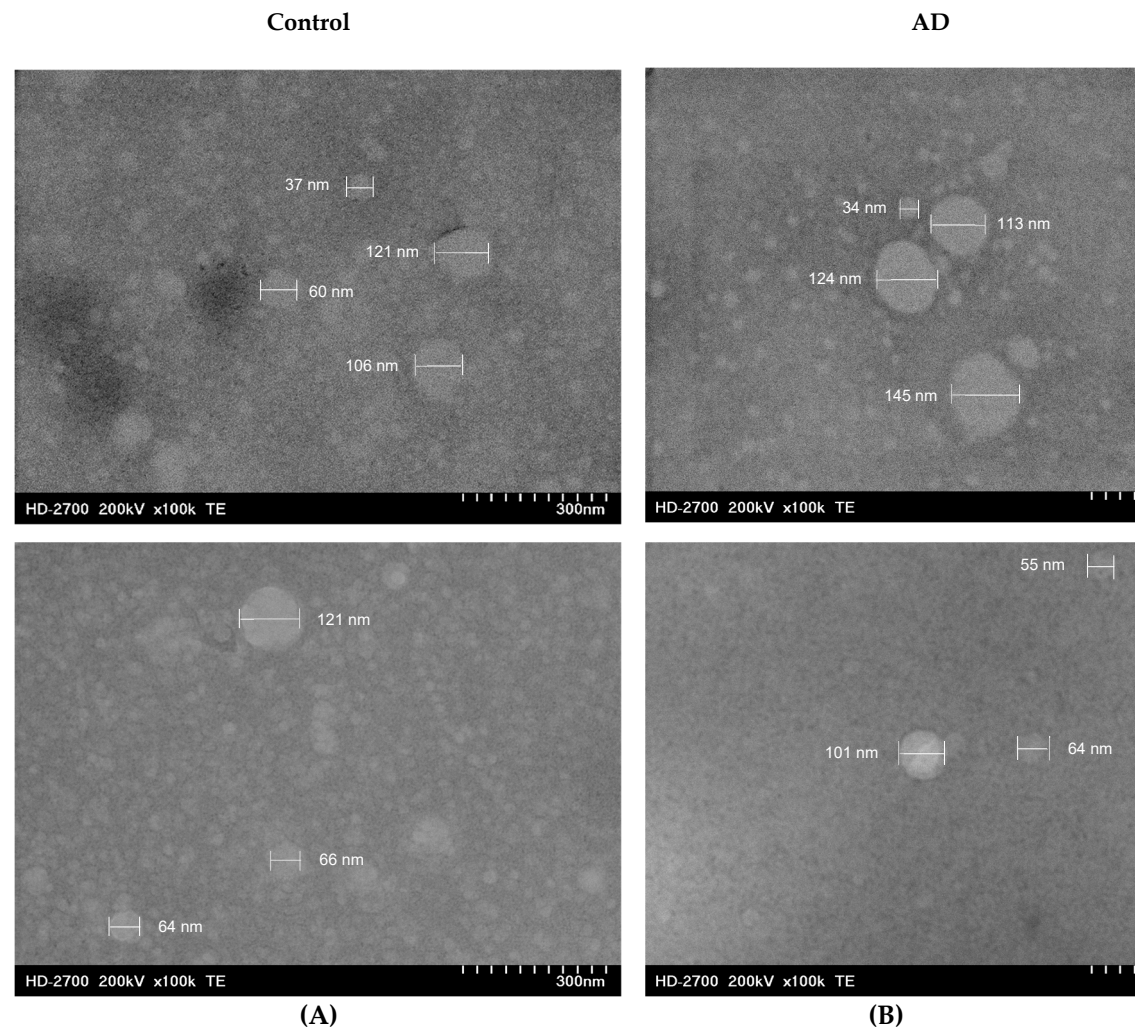

**Supplementary Figure S1. TEM image frames for Controls and AD cases.** Large size entire TEM frames depicted in the manuscript Figure 1 for Controls (A) or AD cases (B).

## Supplementary Figure S2

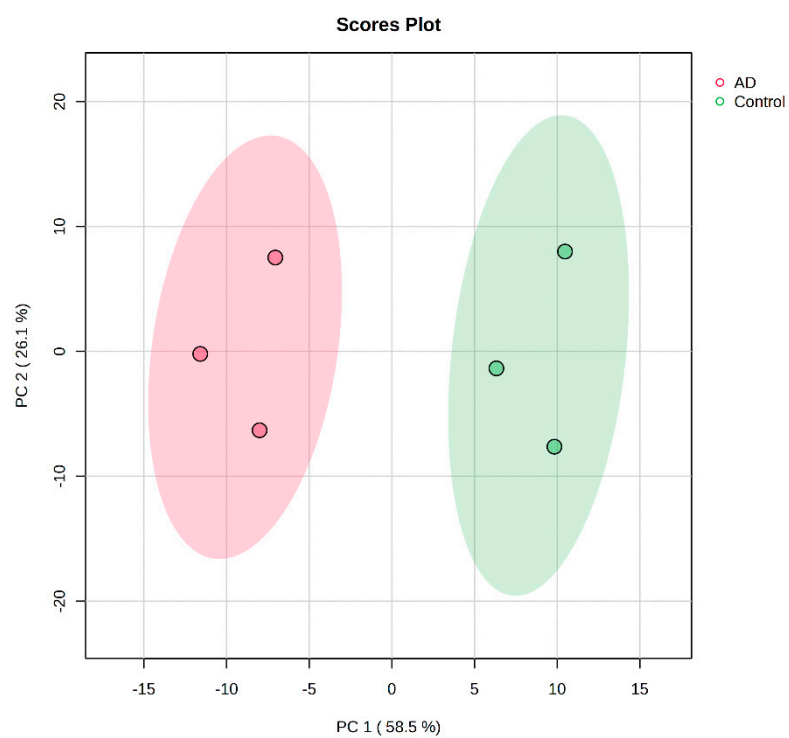

**Supplementary Figure S2. PCA of bdEPs proteome significantly different in AD cases.** A PCA score plot was performed to assess the discrimination between Controls (C1-C3 batches) and AD cases (AD1-AD3 batches). In score plot, the green and pink areas represent the 95% confidence region.

### Supplementary Figure S3

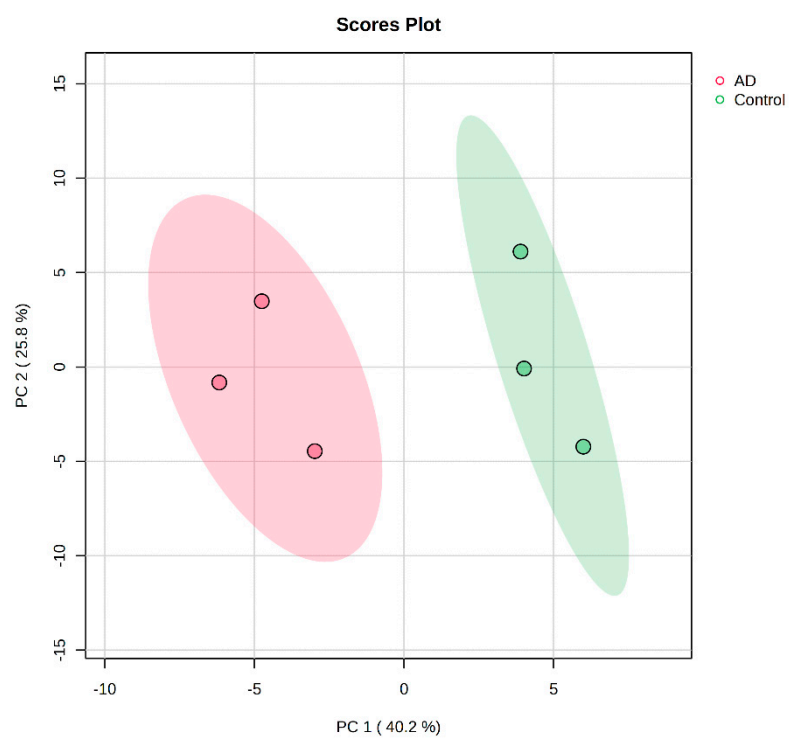

**Supplementary Figure S3. PCA of bdEPs phosphoproteins that significantly changed in AD cases.** A PCA score plot was performed to assess the discrimination between Controls (C1-C3 batches) and AD cases (AD1-AD3 batches). In score plot, the green and pink areas represent the 95% confidence region.

## Supplementary Tables

### Supplementary Table S1

**Supplementary Table S1. Demographics and clinical data of Controls and AD cases.** Data distribution was assessed by Shapiro–Wilk and age; cognitive tests and CSF biomarker concentrations were compared using the non-parametric Kruskal–Wallis test.

|                                       | Controls     |              |              | AD cases      |               |               | Controls vs AD cases |
|---------------------------------------|--------------|--------------|--------------|---------------|---------------|---------------|----------------------|
|                                       | Batch C1     | Batch C2     | Batch C3     | Batch AD1     | Batch AD2     | Batch AD3     | P-value              |
| Age (mean±SD)                         | 64.40±10.33  | 66.00±5.57   | 66.40±12.88  | 65.60±10.48   | 67.80±11.54   | 67.60±9.53    | 0.994                |
| CDT (points)<br>(mean±SD)             | 1.00±0.00    | 1.67±1.16    | 1.80±0.84    | 2.40±1.34     | 3.25±0.50     | 3.40±1.14     | 0.040*               |
| MMSE scores<br>(mean±SD)              | 23.75±3.30   | 29.00±1.73   | 28.5±1.73    | 22.40±4.62    | 21.60±4.62    | 24.00±2.92    | 0.031**              |
| CSF Aβ1-42<br>(ng/mL)<br>(mean±SD)    | 1198.0±136.8 | 1388±638.2   | 1437.0±593.0 | 602.8±100.7   | 606.8±134.5   | 618.8±135.9   | 0.002                |
| CSF Aβ1-40<br>(ng/mL)<br>(mean±SD)    | 8879±2395    | 10216±2387   | 11219±3559   | 13034±2610    | 12676±5932    | 13183±5481    | 0.354                |
| CSF Aβ1-42/1-40 (mean±SD)             | 1.40±0.24    | 1.35±0.58    | 1.31±0.34    | 0.47±0.11     | 0.54±0.33     | 0.50±0.11     | 0.001                |
| CSF P-tau 181<br>(pg/mL)<br>(mean±SD) | 42.40±7.50   | 42.60±14.64  | 52.00±16.93  | 100.60±39.83  | 100.6±34.63   | 74.80±25.12   | 0.003                |
| CSF T-tau<br>(pg/mL)<br>(mean±SD)     | 221.20±44.03 | 242.80±90.26 | 193.00±82.40 | 985.00±598.30 | 838.80±359.00 | 472.60±170.40 | <0.001               |

*Abbreviations:* AD, Alzheimer's disease cases; C, Controls; CDT, Clock-Drawing Test; CSF, Cerebrospinal fluid; MMSE, Mini-Mental State Examination; SD, Standard deviation. \* Data available for n=11 Controls and n=15 ADs. \*\* Data available for n=11 Controls and n=14 ADs.

**Supplementary Table S2. Total proteome significantly changed between Controls and AD cases.** Proteins detected with pan- and/or phosphosite-specific antibodies were included. Average signal intensity and standard deviation were calculated for the 3 batches of Controls (C1-C3) or the 3 batches of AD cases (AD1-AD3). A total of 150 proteins were found to be significantly altered in AD. The changes in signal intensity between Controls and AD cases are presented as the percentage change from Controls (%CFC). The protein signal decrease in AD cases is represented in blue, and the signal increase is represented in light pink. Signal intensities obtained for each target between 3 batches of age-matched Controls and 3 batches of AD cases were compared using a paired t-test.

| Target Name                        | Antibody P-Site | Cat No.   | UniProt ID | Gene name | Controls |      |        | AD    |      |        | %CFC | p-Value |
|------------------------------------|-----------------|-----------|------------|-----------|----------|------|--------|-------|------|--------|------|---------|
|                                    |                 |           |            |           | Mean     | S.D. | S.D. % | Mean  | S.D. | S.D. % |      |         |
| MFN2 (Marf; CPRP1)                 | Pan             | NN290-1   | O95140     | MFN2      | 2410     | 315  | 13     | 1032  | 226  | 22     | -57  | 0.009   |
| ATF2 (CRE-BP1)                     | Pan             | 9222      | P15336     | ATF2      | 317      | 65   | 20     | 141   | 42   | 30     | -56  | 0.020   |
| GRIN1 (NMDAR1; GPRIN1)             | Pan             | NN264-1   | Q7Z2K8     | GPRIN1    | 1467     | 88   | 6      | 770   | 143  | 19     | -48  | 0.020   |
| HSP40 (DNAJB1; DNAJ1; HDJ1; HSPF1) | Pan             | NN057-2   | P25685     | DNAJB1    | 1660     | 242  | 15     | 935   | 172  | 18     | -44  | 0.005   |
| Arrestin b                         | Pan             | 610551    | P49407     | ARRB1     | 2216     | 403  | 18     | 1318  | 116  | 9      | -40  | 0.049   |
| PAK3 (PAKb)                        | Pan             | sc-1871   | O75914     | PAK3      | 478      | 47   | 10     | 313   | 7    | 2      | -34  | 0.048   |
| RPS6                               | S235+ S236      | PN685     | P62753     | RPS6      | 3221     | 994  | 31     | 2116  | 650  | 31     | -34  | 0.049   |
| Tubulin-alpha (TUBA1B)             | Pan             | NN380-1   | P68363     | TUBA1B    | 248      | 13   | 5      | 168   | 8    | 5      | -32  | 0.009   |
| NPAS4 (BHLHE79; NXF; PASD10)       | Pan             | NN299-1   | Q8IUM7     | NPAS4     | 2046     | 114  | 6      | 1415  | 189  | 13     | -31  | 0.008   |
| mTOR (FRAP)                        | Pan             | NK116-4   | P42345     | MTOR      | 15776    | 353  | 2      | 11148 | 1119 | 10     | -29  | 0.024   |
| TARDBP                             | S409+ S410      | PN674     | Q13148     | TARDBP    | 1994     | 259  | 13     | 1424  | 160  | 11     | -29  | 0.030   |
| S100A9                             | Pan             | NN459-3   | P06702     | S100A9    | 3462     | 573  | 17     | 2497  | 402  | 16     | -28  | 0.019   |
| Fer (TYK3)                         | Pan             | AP7704b   | P16591     | FER       | 159      | 13   | 8      | 116   | 5    | 4      | -27  | 0.039   |
| MERTK (MER)                        | Y753            | PK704     | Q12866     | MERTK     | 1919     | 141  | 7      | 1400  | 84   | 6      | -27  | 0.028   |
| TrkA (NGFR; NTRK1)                 | T496            | sc-8058   | P04629     | NTRK1     | 35       | 5    | 14     | 26    | 3    | 12     | -27  | 0.024   |
| HGS (Hrs)                          | Y216            | PN519     | O14964     | HGS       | 3876     | 260  | 7      | 2893  | 66   | 2      | -25  | 0.049   |
| EphB2                              | Y780            | PK610     | P29323     | EPHB2     | 3076     | 403  | 13     | 2298  | 330  | 14     | -25  | 0.015   |
| STRAD (STLK5)                      | Pan             | sc-515635 | Q7RTN6     | STRADA    | 85       | 30   | 36     | 63    | 25   | 39     | -25  | 0.037   |
| I1PP2A (ANP32A/B; PHAP1)           | Pan             | B13007    | P39687     | ANP32A    | 3182     | 232  | 7      | 2390  | 213  | 9      | -25  | 0.026   |

|                                                         |              |                  |        |         |       |      |    |       |     |    |     |       |
|---------------------------------------------------------|--------------|------------------|--------|---------|-------|------|----|-------|-----|----|-----|-------|
| EphA8                                                   | Pan          | AP7613a          | P29322 | EPHA8   | 1102  | 110  | 10 | 831   | 24  | 3  | -25 | 0.050 |
| VIM<br>(Vimentin)                                       | S34          | KAM-<br>CC246    | P08670 | VIM     | 388   | 30   | 8  | 294   | 41  | 14 | -24 | 0.019 |
| Huntingtin<br>(HTT)                                     | S421         | PN829            | P42858 | HTT     | 3191  | 378  | 12 | 2413  | 355 | 15 | -24 | 0.009 |
| MuSK                                                    | Pan          | sc-6010          | O15146 | MUSK    | 1914  | 73   | 4  | 1452  | 54  | 4  | -24 | 0.021 |
| WNK1                                                    | Pan+<br>S382 | PK855            | Q9H4A3 | WNK1    | 583   | 60   | 10 | 443   | 20  | 5  | -24 | 0.044 |
| PTPN6<br>(PTP1C; SH-<br>PTP1)                           | Pan          | sc-7289          | P29350 | PTPN6   | 109   | 19   | 17 | 83    | 22  | 27 | -24 | 0.029 |
| 14-3-3 (KCIP-<br>1)                                     | Pan          | NN441-2          | P31946 | YWHAB   | 3359  | 90   | 3  | 2564  | 174 | 7  | -24 | 0.006 |
| ERK1<br>(MAPK3;<br>ERT2)                                | Pan          | NK055-1          | P27361 | MAPK3   | 24963 | 1145 | 5  | 19112 | 623 | 3  | -23 | 0.031 |
| ERF                                                     | T526         | PN584            | P50548 | ERF     | 7199  | 526  | 7  | 5558  | 391 | 7  | -23 | 0.011 |
| DUSP2<br>(PAC1)                                         | Pan          | NP008-4          | Q05923 | DUSP2   | 11746 | 411  | 3  | 9107  | 835 | 9  | -22 | 0.048 |
| eIF4E                                                   | Pan          | 610270           | P06730 | EIF4E   | 3389  | 87   | 3  | 2628  | 53  | 2  | -22 | 0.011 |
| TAO1<br>(TAOK1)                                         | Y309         | PK827            | Q7L7X3 | TAOK1   | 2974  | 522  | 18 | 2307  | 363 | 16 | -22 | 0.031 |
| FGFR4                                                   | Pan          | NK239-1          | P22455 | FGFR4   | 1899  | 166  | 9  | 1479  | 191 | 13 | -22 | 0.012 |
| CDK8                                                    | Pan          | sc-1521          | P49336 | CDK8    | 1331  | 48   | 4  | 1041  | 111 | 11 | -22 | 0.035 |
| LEF1                                                    | Pan+<br>T155 | PN616            | Q9UJU2 | LEF1    | 1602  | 116  | 7  | 1256  | 77  | 6  | -22 | 0.035 |
| PTPN6<br>(PTP1C; SH-<br>PTP1)                           | Pan          | P17320<br>610126 | P29350 | PTPN6   | 606   | 86   | 14 | 476   | 46  | 10 | -21 | 0.045 |
| IRF3                                                    | T135         | PN610            | Q14653 | IRF3    | 3146  | 84   | 3  | 2476  | 178 | 7  | -21 | 0.043 |
| Jun (c-Jun)                                             | Pan          | sc-74543         | P05412 | JUN     | 34    | 8    | 25 | 27    | 8   | 32 | -21 | 0.021 |
| ErbB3<br>(HER3)                                         | Pan          | NK231-2          | P21860 | ERBB3   | 6350  | 445  | 7  | 5046  | 610 | 12 | -21 | 0.012 |
| PTPN11<br>(PTP1D;<br>PTP2C;<br>SHP2;<br>SHPTP2;<br>Syp) | Pan          | P54420<br>610622 | Q06124 | PTPN11  | 995   | 114  | 12 | 792   | 73  | 9  | -20 | 0.039 |
| DUSP6                                                   | Pan          | NP040-3          | Q16828 | DUSP6   | 5591  | 454  | 8  | 4461  | 284 | 6  | -20 | 0.012 |
| Raf1 (c-Raf;<br>RafC)                                   | Pan          | NK156-5          | P04049 | RAF1    | 4479  | 731  | 16 | 3621  | 566 | 16 | -19 | 0.026 |
| TRPV4                                                   | Pan          | NN464-2          | Q9HBA0 | TRPV4   | 915   | 90   | 10 | 741   | 60  | 8  | -19 | 0.016 |
| MEKK2<br>(MAP3K2)                                       | Pan          | NK108-5          | Q9Y2U5 | MAP3K2  | 24101 | 303  | 1  | 19506 | 362 | 2  | -19 | 0.010 |
| STAT1                                                   | Pan+<br>S727 | PN667            | P42224 | STAT1   | 11021 | 382  | 3  | 8946  | 321 | 4  | -19 | 0.017 |
| HRAS (H-<br>Ras)                                        | Y157         | PN755            | P01112 | HRAS    | 6258  | 166  | 3  | 5086  | 273 | 5  | -19 | 0.009 |
| Met (HGF<br>receptor)                                   | Pan          | NK110-2          | P08581 | MET     | 19637 | 743  | 4  | 15992 | 337 | 2  | -19 | 0.027 |
| ATG2A                                                   | Pan          | NN209-1          | Q2TAZ0 | ATG2A   | 1806  | 179  | 10 | 1471  | 145 | 10 | -19 | 0.028 |
| FOXO1A<br>(FKHR;<br>FKHRL1)                             | S256         | 11115            | Q12778 | FOXO1   | 725   | 97   | 13 | 592   | 58  | 10 | -18 | 0.040 |
| PRKAR2A<br>(PRKAR2;<br>PKR2)                            | Pan          | sc-<br>137220    | P13861 | PRKAR2A | 20    | 3    | 16 | 17    | 4   | 24 | -18 | 0.038 |
| TRIM28<br>(TIF1B)                                       | S473         | PK833            | Q13263 | TRIM28  | 838   | 169  | 20 | 693   | 152 | 22 | -17 | 0.015 |
| KCNQ2                                                   | Pan          | NN275-1          | O43526 | KCNQ2   | 514   | 61   | 12 | 425   | 52  | 12 | -17 | 0.022 |

|                                                 |                        |                  |        |         |       |      |    |       |      |    |     |       |
|-------------------------------------------------|------------------------|------------------|--------|---------|-------|------|----|-------|------|----|-----|-------|
| I4-3-3 (KCIP-1)                                 | Pan                    | sc-1657          | P31946 | YWHAB   | 968   | 82   | 8  | 808   | 61   | 7  | -17 | 0.029 |
| Plk1 (PLK)                                      | Pan                    | NK145-2          | P53350 | PLK1    | 28422 | 514  | 2  | 23786 | 866  | 4  | -16 | 0.012 |
| CDC34                                           | Pan                    | C25820<br>610250 | P49427 | CDC34   | 5955  | 427  | 7  | 4989  | 274  | 6  | -16 | 0.016 |
| HRAS (H-Ras)                                    | Pan                    | NN281-3          | P01112 | HRAS    | 6418  | 586  | 9  | 5410  | 509  | 9  | -16 | 0.045 |
| ATM                                             | Pan                    | NK230-1          | Q13315 | ATM     | 15436 | 902  | 6  | 13015 | 987  | 8  | -16 | 0.002 |
| CDK15<br>(PFTAIRES2;<br>ALS2CR7)                | Pan                    | NK004-2          | Q96Q40 | CDK15   | 8166  | 171  | 2  | 6892  | 174  | 3  | -16 | 0.006 |
| ADRA2C<br>(ADRA2L2;<br>ADRA2RL2)                | Pan                    | NN190-2          | P18825 | ADRA2C  | 212   | 107  | 50 | 180   | 99   | 55 | -15 | 0.034 |
| DLG4<br>(PSD95)                                 | Pan                    | NN142            | P78352 | DLG4    | 9953  | 1528 | 15 | 8471  | 1219 | 14 | -15 | 0.042 |
| NRP1                                            | Pan                    | NN604-2          | O14786 | NRP1    | 20438 | 1125 | 6  | 17403 | 643  | 4  | -15 | 0.013 |
| Hsc70<br>(HSPA8;<br>Hsc70;<br>HSP73;<br>HSPA10) | Pan                    | NN060-<br>12     | P11142 | HSPA8   | 1769  | 71   | 4  | 1511  | 110  | 7  | -15 | 0.034 |
| MEKK1<br>(MAP3K1)                               | Pan                    | KAP-<br>SA001    | Q13233 | MAP3K1  | 2784  | 383  | 14 | 2382  | 454  | 19 | -14 | 0.033 |
| PML                                             | Pan+<br>S518           | PN641            | P29590 | PML     | 12768 | 110  | 1  | 10932 | 287  | 3  | -14 | 0.015 |
| RIOK2                                           | S332+<br>S335+<br>S337 | PK890            | Q9BVS4 | RIOK2   | 11389 | 756  | 7  | 9766  | 439  | 4  | -14 | 0.019 |
| IKZF1                                           | Y413                   | PN707            | Q13422 | IKZF1   | 642   | 59   | 9  | 556   | 42   | 8  | -13 | 0.027 |
| Met (HGF<br>receptor)                           | Pan                    | NK110-4          | P08581 | MET     | 10649 | 265  | 2  | 9226  | 543  | 6  | -13 | 0.025 |
| CAMK2d                                          | Pan                    | NK019-3          | Q13557 | CAMK2D  | 13916 | 237  | 2  | 12127 | 298  | 2  | -13 | 0.016 |
| RSK1<br>(RPS6KA1;<br>p90RSK)                    | S221                   | PK804            | Q15418 | RPS6KA1 | 2242  | 251  | 11 | 1954  | 321  | 16 | -13 | 0.050 |
| PPP3CC<br>(Calcinerin<br>Ag)                    | Pan+<br>S463           | PP506            | P48454 | PPP3CC  | 4161  | 784  | 19 | 3629  | 678  | 19 | -13 | 0.024 |
| ERK1<br>(MAPK3;<br>ERT2)                        | S283                   | PK879            | P27361 | MAPK3   | 18022 | 354  | 2  | 15718 | 949  | 6  | -13 | 0.044 |
| SRPK1                                           | S222                   | PK819            | Q96SB4 | SRPK1   | 392   | 49   | 13 | 342   | 47   | 14 | -13 | 0.001 |
| Huntingtin<br>(HTT)                             | Pan+<br>S417+<br>S419  | PN828            | P42858 | HTT     | 4394  | 146  | 3  | 3842  | 38   | 1  | -13 | 0.040 |
| CDK15<br>(PFTAIRES2;<br>ALS2CR7)                | Pan                    | NK004-3          | Q96Q40 | CDK15   | 6910  | 406  | 6  | 6080  | 249  | 4  | -12 | 0.035 |
| Tyro3                                           | Y685+<br>Y686          | PK848            | Q06418 | TYRO3   | 609   | 56   | 9  | 536   | 42   | 8  | -12 | 0.025 |
| CD63                                            | Pan                    | ab68418          | P08962 | CD63    | 9594  | 494  | 5  | 8494  | 702  | 8  | -11 | 0.018 |
| MEKK6<br>(MAP3K6;<br>ASK2)                      | Pan                    | NK225-2          | O95382 | MAP3K6  | 5787  | 372  | 6  | 5137  | 457  | 9  | -11 | 0.049 |
| ATR                                             | Pan                    | NK237-1          | Q13535 | ATR     | 8122  | 220  | 3  | 7240  | 183  | 3  | -11 | 0.012 |
| MLK4<br>(MAP3K21)                               | Pan                    | NK280-1          | Q5TCX8 | MAP3K21 | 11348 | 136  | 1  | 10170 | 196  | 2  | -10 | 0.018 |

|                                             |                 |               |        |         |       |      |   |       |     |   |     |       |
|---------------------------------------------|-----------------|---------------|--------|---------|-------|------|---|-------|-----|---|-----|-------|
| p70S6K<br>(S6Ka;<br>RPS6KB1)                | Pan             | NK223-4       | P23443 | RPS6KB1 | 10262 | 812  | 8 | 9208  | 630 | 7 | -10 | 0.027 |
| CDK1<br>(CDC2)                              | T161            | 11134         | P06493 | CDK1    | 5966  | 344  | 6 | 5425  | 212 | 4 | -9  | 0.042 |
| UT-A1<br>(Slc14a2;<br>HUT2; UT2)            | Pan             | NN355-1       | Q15849 | SLC14A2 | 342   | 3    | 1 | 311   | 9   | 3 | -9  | 0.028 |
| DNAPK<br>(PRKDC)                            | Pan             | NK048-6       | P78527 | PRKDC   | 27666 | 1476 | 5 | 25164 | 988 | 4 | -9  | 0.040 |
| CDK5                                        | Y15             | PK570         | Q00535 | CDK5    | 8322  | 240  | 3 | 7582  | 243 | 3 | -9  | 0.023 |
| Cas-L                                       | Pan+<br>Y166    | PN505         | Q14511 | NEDD9   | 9706  | 525  | 5 | 8867  | 611 | 7 | -9  | 0.006 |
| CDK1<br>(CDC2)                              | Pan             | sc-954        | P06493 | CDK1    | 11465 | 227  | 2 | 10489 | 329 | 3 | -9  | 0.037 |
| CDK6                                        | Pan             | C150M         | Q00534 | CDK6    | 9012  | 375  | 4 | 8284  | 530 | 6 | -8  | 0.025 |
| ILK1 (ILK)                                  | Pan             | KAP-<br>ST203 | Q13418 | ILK     | 225   | 8    | 4 | 207   | 4   | 2 | -8  | 0.031 |
| NFKB1                                       | S903            | PN634         | P19838 | NFKB1   | 18069 | 559  | 3 | 16636 | 160 | 1 | -8  | 0.042 |
| ERK1<br>(MAPK3;<br>ERT2)                    | Pan             | NK055-2       | P27361 | MAPK3   | 6499  | 246  | 4 | 5984  | 393 | 7 | -8  | 0.046 |
| MKK3<br>(MAP2K3;<br>MEK3)                   | Pan             | NK101-6       | P46734 | MAP2K3  | 18500 | 73   | 0 | 17095 | 45  | 0 | -8  | 0.001 |
| Raf1 (c-Raf;<br>RafC)                       | Pan             | NK155-5       | P04049 | RAF1    | 8251  | 743  | 9 | 7653  | 678 | 9 | -7  | 0.035 |
| CDK7<br>(MO15)                              | Pan             | NK030-1       | P50613 | CDK7    | 6901  | 470  | 7 | 6413  | 573 | 9 | -7  | 0.024 |
| ErbB2 (Neu;<br>HER2)                        | Y1248           | PK613         | P04626 | ERBB2   | 9188  | 417  | 5 | 8540  | 303 | 4 | -7  | 0.020 |
| AMPKa2<br>(PRKAA2)                          | S377            | PK522         | P54646 | PRKAA2  | 6756  | 188  | 3 | 6291  | 198 | 3 | -7  | 0.028 |
| PRMT5                                       | T634            | PN549         | O14744 | PRMT5   | 21174 | 422  | 2 | 20052 | 738 | 4 | -5  | 0.041 |
| DNMT3A                                      | S105            | PN746         | Q9Y6K1 | DNMT3A  | 16328 | 276  | 2 | 15547 | 58  | 0 | -5  | 0.041 |
| GTF2I                                       | S412            | PN602         | P78347 | GTF2I   | 10249 | 459  | 4 | 9917  | 420 | 4 | -3  | 0.047 |
| TP53 (p53)                                  | S6+S9           | PN637         | P04637 | TP53    | 19420 | 566  | 3 | 18849 | 623 | 3 | -3  | 0.032 |
| CDK1<br>(CDC2)                              | T161            | PK561         | P06493 | CDK1    | 5565  | 425  | 8 | 5408  | 395 | 7 | -3  | 0.018 |
| CDC25B                                      | Pan             | NP002-4       | P30305 | CDC25B  | 11204 | 158  | 1 | 10926 | 130 | 1 | -2  | 0.006 |
| Fyn                                         | Pan             | NK065-2       | P06241 | FYN     | 6521  | 112  | 2 | 6401  | 92  | 1 | -2  | 0.017 |
| MRLC1                                       | T19+S20         | PN836         | P24844 | MYL9    | 15972 | 386  | 2 | 16236 | 349 | 2 | 2   | 0.020 |
| IRS1                                        | Y612            | 44-816G       | P35568 | IRS1    | 423   | 31   | 7 | 433   | 34  | 8 | 2   | 0.050 |
| NOS3<br>(eNOS)                              | T1175+<br>S1177 | PN712         | P29474 | NOS3    | 19919 | 540  | 3 | 20431 | 453 | 2 | 3   | 0.030 |
| FOXO3<br>(FKHRL1)                           | S253            | PN821         | O43524 | FOXO3   | 11084 | 150  | 1 | 11504 | 199 | 2 | 4   | 0.032 |
| GABBR1<br>(GABA B<br>Receptor 1;<br>GPRC3A) | T873            | PN796         | Q9UBS5 | GABBR1  | 8232  | 166  | 2 | 8556  | 120 | 1 | 4   | 0.029 |
| PTPRK (PTP-<br>kappa)                       | Y916            | PP524         | Q15262 | PTPRK   | 15708 | 348  | 2 | 16527 | 510 | 3 | 5   | 0.029 |
| GCN2<br>(EIF2AK4)                           | Pan             | AP8062a       | Q9P2K8 | EIF2AK4 | 85    | 8    | 9 | 89    | 8   | 9 | 5   | 0.023 |



|                                           |               |                  |        |         |       |      |    |       |      |    |    |       |
|-------------------------------------------|---------------|------------------|--------|---------|-------|------|----|-------|------|----|----|-------|
| ERK5<br>(MAPK7;<br>BMK)                   | Pan           | sc-<br>398015    | Q13164 | MAPK7   | 9154  | 493  | 5  | 9678  | 373  | 4  | 6  | 0.026 |
| Met (HGF<br>receptor)                     | Pan           | NK110-3          | P08581 | MET     | 2163  | 112  | 5  | 2327  | 154  | 7  | 8  | 0.034 |
| PPP5C<br>(PP5C; PP5;<br>PPT)              | Y119          | PP507            | P53041 | PPP5C   | 13138 | 1194 | 9  | 14258 | 1204 | 8  | 9  | 0.016 |
| EGFR<br>(ErbB1)                           | Y1172         | XBP-<br>4085     | P00533 | EGFR    | 2840  | 50   | 2  | 3090  | 103  | 3  | 9  | 0.022 |
| HMGCR                                     | S872          | PN705            | P04035 | HMGCR   | 9269  | 500  | 5  | 10108 | 371  | 4  | 9  | 0.019 |
| PTPN1<br>(PTP1B)                          | Y46           | PP533            | P18031 | PTPN1   | 14053 | 341  | 2  | 15347 | 674  | 4  | 9  | 0.040 |
| IKKb (IkbKB;<br>IKKB)                     | Pan           | KAP-<br>TF118    | O14920 | IKKB    | 3043  | 68   | 2  | 3324  | 96   | 3  | 9  | 0.016 |
| CDK11B<br>(PITSLRE;<br>p58/GTA;<br>CLK-1) | Pan           | sc-928           | P21127 | CDK11B  | 2497  | 169  | 7  | 2736  | 163  | 6  | 10 | 0.044 |
| ZAP70                                     | Pan           | Z24820<br>610240 | P43403 | ZAP70   | 122   | 7    | 5  | 134   | 3    | 2  | 10 | 0.042 |
| MEK5<br>(MAP2K5;<br>MKK5)                 | S311          | PK699            | Q13163 | MAP2K5  | 14896 | 619  | 4  | 16430 | 586  | 4  | 10 | 0.002 |
| Mos                                       | Pan           | NK112            | P00540 | MOS     | 5186  | 219  | 4  | 5722  | 72   | 1  | 10 | 0.049 |
| GIT1                                      | Y545          | PN517            | Q9Y2X7 | GIT1    | 2208  | 165  | 7  | 2436  | 187  | 8  | 10 | 0.039 |
| p73 (TP73)                                | Y99           | PN861            | O15350 | TP73    | 5285  | 130  | 2  | 5849  | 94   | 2  | 11 | 0.035 |
| PU.1                                      | S146          | PN647            | P17947 | SP1     | 1781  | 106  | 6  | 1976  | 161  | 8  | 11 | 0.038 |
| FAK (PTK2)                                | S722          | sc-16662-<br>R   | Q05397 | PTK2    | 3661  | 419  | 11 | 4064  | 482  | 12 | 11 | 0.035 |
| GLUT2<br>(SLC2A2)                         | Pan           | NN262-1          | P11168 | SLC2A2  | 2520  | 155  | 6  | 2800  | 198  | 7  | 11 | 0.017 |
| PPP2R4<br>(PP2A<br>subunit B';<br>PTPA)   | Y223          | PP550            | Q15257 | PTPA    | 10131 | 96   | 1  | 11281 | 357  | 3  | 11 | 0.042 |
| PPPM1B<br>(PP2Cb;<br>PPM1B)               | Y367          | PP540            | O75688 | PPM1B   | 4732  | 402  | 9  | 5271  | 559  | 11 | 11 | 0.046 |
| ACTB (beta-<br>actin)                     | Y53           | PN501            | P60709 | ACTB    | 3865  | 212  | 5  | 4357  | 89   | 2  | 13 | 0.036 |
| RSK1<br>(RPS6KA1;<br>p90RSK)              | S380          | PK805            | Q15418 | RPS6KA1 | 1520  | 176  | 12 | 1714  | 145  | 8  | 13 | 0.013 |
| PCTK2<br>(PCTAIRE2;<br>CDK17)             | S180          | PK756            | Q00537 | CDK17   | 5889  | 803  | 14 | 6646  | 825  | 12 | 13 | 0.016 |
| CLK3                                      | Pan           | AP7531a          | P49761 | CLK3    | 36    | 11   | 29 | 41    | 9    | 23 | 13 | 0.039 |
| Tec                                       | Y519          | PK829            | P42680 | TEC     | 847   | 38   | 5  | 960   | 61   | 6  | 13 | 0.041 |
| PAK2<br>(PAKg)                            | Pan           | sc-1872          | Q13177 | PAK2    | 2865  | 153  | 5  | 3255  | 119  | 4  | 14 | 0.030 |
| TERF1                                     | T371          | PN675            | P54274 | TERF1   | 1211  | 169  | 14 | 1380  | 131  | 10 | 14 | 0.025 |
| Nek2                                      | Pan           | 71-3700          | P51955 | NEK2    | 375   | 18   | 5  | 428   | 31   | 7  | 14 | 0.036 |
| Gab1                                      | Y406          | PN516            | Q13480 | GAB1    | 1956  | 344  | 18 | 2238  | 430  | 19 | 14 | 0.043 |
| ATR                                       | S435+<br>S436 | PK528            | Q13535 | ATR     | 14817 | 1393 | 9  | 16973 | 1108 | 7  | 15 | 0.024 |
| Nek2                                      | S171          | PK732            | P51955 | NEK2    | 13503 | 703  | 5  | 15538 | 1042 | 7  | 15 | 0.017 |

|                                                                    |                  |           |        |         |      |     |    |       |     |    |    |       |
|--------------------------------------------------------------------|------------------|-----------|--------|---------|------|-----|----|-------|-----|----|----|-------|
| UGDH                                                               | Y352             | PN782     | O60701 | UGDH    | 2910 | 238 | 8  | 3348  | 139 | 4  | 15 | 0.031 |
| SGK1                                                               | Pan              | NK294-1   | O00141 | SGK1    | 752  | 67  | 9  | 876   | 81  | 9  | 16 | 0.008 |
| Met (HGF receptor)                                                 | S1236            | PK705     | P08581 | MET     | 3216 | 86  | 3  | 3761  | 164 | 4  | 17 | 0.049 |
| MAFG                                                               | Pan+ S124        | PN617     | O15525 | MAFG    | 3341 | 153 | 5  | 3931  | 216 | 5  | 18 | 0.012 |
| FLT3 (STK1; CD135)                                                 | Pan              | NK240-2   | P36888 | FLT3    | 5109 | 60  | 1  | 6012  | 156 | 3  | 18 | 0.006 |
| IκBa (MAD3; IκBa)                                                  | Pan              | DB075     | P25963 | NFKBIA  | 1290 | 40  | 3  | 1527  | 54  | 4  | 18 | 0.036 |
| KRS2                                                               | Pan              | 33-3000   | Q13043 | STK4    | 3980 | 286 | 7  | 4715  | 381 | 8  | 18 | 0.021 |
| MOR1 (mu opiod receptor)                                           | T372+ S377+ T378 | PN802     | P35372 | OPRM1   | 4856 | 252 | 5  | 5786  | 88  | 2  | 19 | 0.020 |
| HIPK2                                                              | Pan              | NK272-1   | Q9H2X6 | HIPK2   | 2872 | 229 | 8  | 3427  | 318 | 9  | 19 | 0.045 |
| ARID1A                                                             | S363             | PN740     | O14497 | ARID1A  | 9211 | 866 | 9  | 11025 | 546 | 5  | 20 | 0.026 |
| BLNK                                                               | Y84              | 44-220    | Q8WV28 | BLNK    | 4451 | 749 | 17 | 5334  | 485 | 9  | 20 | 0.043 |
| ERK1 (MAPK3; ERT2)                                                 | Pan              | NK055-4   | P27361 | MAPK3   | 2085 | 71  | 3  | 2524  | 63  | 2  | 21 | 0.002 |
| PKN1 (PRK1)                                                        | T774             | PK781     | Q16512 | PKN1    | 3972 | 629 | 16 | 4813  | 407 | 8  | 21 | 0.034 |
| p38a MAPK (MAPK14; CSBP; MXI2; SAPK2a)                             | Pan              | NK120-4   | Q16539 | MAPK14  | 1021 | 134 | 13 | 1259  | 185 | 15 | 23 | 0.031 |
| GSK3b                                                              | Pan              | KAP-ST002 | P49841 | GSK3B   | 2105 | 182 | 9  | 2602  | 196 | 8  | 24 | 0.000 |
| NMDAR2A NMDA (GRIN2A; Glutamate [NMDA] receptor subunit epsilon-1) | Pan              | NN297-1   | Q12879 | GRIN2A  | 673  | 90  | 13 | 835   | 87  | 10 | 24 | 0.001 |
| VACAMKL                                                            | Y245             | PK892     | Q8NCB2 | CAMKV   | 541  | 45  | 8  | 671   | 71  | 11 | 24 | 0.020 |
| SMARCA4                                                            | S610+ S613       | PN726     | P51532 | SMARCA4 | 1067 | 146 | 14 | 1327  | 96  | 7  | 24 | 0.019 |
| GATA3                                                              | S369             | PN702     | P23771 | GATA3   | 1914 | 141 | 7  | 2416  | 213 | 9  | 26 | 0.012 |
| PTPN12 (PTP-PEST; PTPG1)                                           | Pan              | P105M     | Q05209 | PTPN12  | 158  | 39  | 24 | 201   | 39  | 19 | 27 | 0.015 |
| Nur77                                                              | Pan+ S351        | PN636     | P22736 | NR4A1   | 2995 | 71  | 2  | 3835  | 195 | 5  | 28 | 0.033 |
| VEGFR2 (KDR)                                                       | Y1059            | 11531     | P35968 | KDR     | 186  | 20  | 11 | 242   | 33  | 13 | 30 | 0.030 |
| TrkB (NTRK2)                                                       | Y706+ Y707       | PK917     | Q16620 | NTRK2   | 1708 | 65  | 4  | 2247  | 100 | 4  | 32 | 0.039 |
| AMPKα1 (PRKAA1)                                                    | T183+ S184       | PK521     | Q13131 | PRKAA1  | 4926 | 499 | 10 | 6566  | 564 | 9  | 33 | 0.039 |
| HGK (MAP4K4; NIK; ZC1)                                             | Pan              | NK300-1   | O95819 | MAP4K4  | 295  | 16  | 5  | 393   | 34  | 9  | 34 | 0.019 |
| MEK5 (MAP2K5; MKK5)                                                | Pan              | sc-1287   | Q13163 | MAP2K5  | 2772 | 339 | 12 | 3752  | 156 | 4  | 35 | 0.031 |

|                                 |      |         |        |       |      |     |    |      |     |    |     |       |
|---------------------------------|------|---------|--------|-------|------|-----|----|------|-----|----|-----|-------|
| JAK1                            | Pan  | sc-277  | P23458 | JAK1  | 259  | 13  | 5  | 356  | 11  | 3  | 37  | 0.028 |
| NLK                             | Pan  | sc-8211 | Q9UBE8 | NLK   | 317  | 45  | 14 | 447  | 30  | 7  | 41  | 0.013 |
| Ankyrin<br>(ANK1;<br>Ankyrin-R) | Pan  | NN195-1 | P16157 | ANK1  | 482  | 59  | 12 | 683  | 94  | 14 | 42  | 0.043 |
| WNK4<br>(PRKWNK4)               | Pan  | NK255-1 | Q96J92 | WNK4  | 1563 | 241 | 15 | 2373 | 362 | 15 | 52  | 0.034 |
| TAO1<br>(TAOK1)                 | S181 | PK826   | Q7L7X3 | TAOK1 | 262  | 17  | 6  | 419  | 50  | 12 | 60  | 0.023 |
| GRK1<br>(Rhodopsin<br>kinase)   | Pan  | sc-8004 | Q15835 | GRK1  | 288  | 20  | 7  | 615  | 49  | 8  | 114 | 0.017 |

**Supplementary Table S3. Phosphoproteins that significantly changed between Controls and AD cases.** Only proteins detected with phosphosite-specific antibodies were included. Average signal intensity and standard deviation were calculated for the 3 batches of Controls (C1-C3) or the 3 batches of AD cases (AD1-AD3). The changes in signal intensity between Controls and AD cases are presented as the percentage change from Controls (%CFC). Signal decrease in AD cases is represented in blue, and the signal increase is represented in light pink. Signal intensities obtained for each target between 3 batches of age-matched Controls and 3 batches of AD cases were compared using a paired t-test.

| Target Name            | Antibody P-Site | Cat No.   | UniProt ID | Gene name | Controls |     |      | AD    |     |      | %CFC | P-Value |
|------------------------|-----------------|-----------|------------|-----------|----------|-----|------|-------|-----|------|------|---------|
|                        |                 |           |            |           | Mean     | SD  | SD % | Mean  | SD  | SD % |      |         |
| RPS6                   | S235+S236       | PN685     | P62753     | RPS6      | 3221     | 994 | 31   | 2116  | 650 | 31   | -34  | 0.049   |
| TARDBP                 | S409+S410       | PN674     | Q13148     | TARDBP    | 1994     | 259 | 13   | 1424  | 160 | 11   | -29  | 0.030   |
| MERTK (MER)            | Y753            | PK704     | Q12866     | MERTK     | 1919     | 141 | 7    | 1400  | 84  | 6    | -27  | 0.028   |
| TrkA (NGFR; NTRK1)     | T496            | sc-8058   | P04629     | NTRK1     | 35       | 5   | 14   | 26    | 3   | 12   | -27  | 0.024   |
| HGS (Hrs)              | Y216            | PN519     | O14964     | HGS       | 3876     | 260 | 7    | 2893  | 66  | 2    | -25  | 0.049   |
| EphB2                  | Y780            | PK610     | P29323     | EPHB2     | 3076     | 403 | 13   | 2298  | 330 | 14   | -25  | 0.015   |
| VIM (Vimentin)         | S34             | KAM-CC246 | P08670     | VIM       | 388      | 30  | 8    | 294   | 41  | 14   | -24  | 0.019   |
| Huntingtin (HTT)       | S421            | PN829     | P42858     | HTT       | 3191     | 378 | 12   | 2413  | 355 | 15   | -24  | 0.009   |
| ERF                    | T526            | PN584     | P50548     | ERF       | 7199     | 526 | 7    | 5558  | 391 | 7    | -23  | 0.011   |
| TAO1 (TAOK1)           | Y309            | PK827     | Q7L7X3     | TAOK1     | 2974     | 522 | 18   | 2307  | 363 | 16   | -22  | 0.031   |
| IRF3                   | T135            | PN610     | Q14653     | IRF3      | 3146     | 84  | 3    | 2476  | 178 | 7    | -21  | 0.043   |
| HRAS (H-Ras)           | Y157            | PN755     | P01112     | HRAS      | 6258     | 166 | 3    | 5086  | 273 | 5    | -19  | 0.009   |
| FOXO1A (FKHR; FKHL1)   | S256            | 11115     | Q12778     | FOXO1     | 725      | 97  | 13   | 592   | 58  | 10   | -18  | 0.040   |
| TRIM28 (TIF1B)         | S473            | PK833     | Q13263     | TRIM28    | 838      | 169 | 20   | 693   | 152 | 22   | -17  | 0.015   |
| RIOK2                  | S332+S335+S337  | PK890     | Q9BVS4     | RIOK2     | 11389    | 756 | 7    | 9766  | 439 | 4    | -14  | 0.019   |
| IKZF1                  | Y413            | PN707     | Q13422     | IKZF1     | 642      | 59  | 9    | 556   | 42  | 8    | -13  | 0.027   |
| RSK1 (RPS6KA1; p90RSK) | S221            | PK804     | Q15418     | RPS6KA1   | 2242     | 251 | 11   | 1954  | 321 | 16   | -13  | 0.050   |
| ERK1 (MAPK3; ERT2)     | S283            | PK879     | P27361     | MAPK3     | 18022    | 354 | 2    | 15718 | 949 | 6    | -13  | 0.044   |
| SRPK1                  | S222            | PK819     | Q96SB4     | SRPK1     | 392      | 49  | 13   | 342   | 47  | 14   | -13  | 0.001   |
| Tyro3                  | Y685+Y686       | PK848     | Q06418     | TYRO3     | 609      | 56  | 9    | 536   | 42  | 8    | -12  | 0.025   |

|                                    |              |            |        |        |       |      |    |       |      |    |    |       |
|------------------------------------|--------------|------------|--------|--------|-------|------|----|-------|------|----|----|-------|
| CDK1 (CDC2)                        | T161         | 11134      | P06493 | CDK1   | 5966  | 344  | 6  | 5425  | 212  | 4  | -9 | 0.042 |
| CDK5                               | Y15          | PK570      | Q00535 | CDK5   | 8322  | 240  | 3  | 7582  | 243  | 3  | -9 | 0.023 |
| NFKB1                              | S903         | PN634      | P19838 | NFKB1  | 18069 | 559  | 3  | 16636 | 160  | 1  | -8 | 0.042 |
| ErbB2 (Neu; HER2)                  | Y1248        | PK613      | P04626 | ERBB2  | 9188  | 417  | 5  | 8540  | 303  | 4  | -7 | 0.020 |
| AMPKa2 (PRKAA2)                    | S377         | PK522      | P54646 | PRKAA2 | 6756  | 188  | 3  | 6291  | 198  | 3  | -7 | 0.028 |
| PRMT5                              | T634         | PN549      | O14744 | PRMT5  | 21174 | 422  | 2  | 20052 | 738  | 4  | -5 | 0.041 |
| DNMT3A                             | S105         | PN746      | Q9Y6K1 | DNMT3A | 16328 | 276  | 2  | 15547 | 58   | 0  | -5 | 0.041 |
| GTF2I                              | S412         | PN602      | P78347 | GTF2I  | 10249 | 459  | 4  | 9917  | 420  | 4  | -3 | 0.047 |
| TP53 (p53)                         | S6+S9        | PN637      | P04637 | TP53   | 19420 | 566  | 3  | 18849 | 623  | 3  | -3 | 0.032 |
| CDK1 (CDC2)                        | T161         | PK561      | P06493 | CDK1   | 5565  | 425  | 8  | 5408  | 395  | 7  | -3 | 0.018 |
| MRLC1                              | T19+S20      | PN836      | P24844 | MYL9   | 15972 | 386  | 2  | 16236 | 349  | 2  | 2  | 0.020 |
| IRS1                               | Y612         | 44-816G    | P35568 | IRS1   | 423   | 31   | 7  | 433   | 34   | 8  | 2  | 0.050 |
| NOS3 (eNOS)                        | T1175+ S1177 | PN712      | P29474 | NOS3   | 19919 | 540  | 3  | 20431 | 453  | 2  | 3  | 0.030 |
| FOXO3 (FKHRL1)                     | S253         | PN821      | O43524 | FOXO3  | 11084 | 150  | 1  | 11504 | 199  | 2  | 4  | 0.032 |
| GABBR1 (GABA B Receptor 1; GPRC3A) | T873         | PN796      | Q9UBS5 | GABBR1 | 8232  | 166  | 2  | 8556  | 120  | 1  | 4  | 0.029 |
| PTPRK (PTP-kappa)                  | Y916         | PP524      | Q15262 | PTPRK  | 15708 | 348  | 2  | 16527 | 510  | 3  | 5  | 0.029 |
| PPP5C (PP5C; PP5; PPT)             | Y119         | PP507      | P53041 | PPP5C  | 13138 | 1194 | 9  | 14258 | 1204 | 8  | 9  | 0.016 |
| EGFR (ErbB1)                       | Y1172        | XBP-4085   | P00533 | EGFR   | 2840  | 50   | 2  | 3090  | 103  | 3  | 9  | 0.022 |
| HMGCR                              | S872         | PN705      | P04035 | HMGCR  | 9269  | 500  | 5  | 10108 | 371  | 4  | 9  | 0.019 |
| PTPN1 (PTP1B)                      | Y46          | PP533      | P18031 | PTPN1  | 14053 | 341  | 2  | 15347 | 674  | 4  | 9  | 0.040 |
| MEK5 (MAP2K5; MKK5)                | S311         | PK699      | Q13163 | MAP2K5 | 14896 | 619  | 4  | 16430 | 586  | 4  | 10 | 0.002 |
| GIT1                               | Y545         | PN517      | Q9Y2X7 | GIT1   | 2208  | 165  | 7  | 2436  | 187  | 8  | 10 | 0.039 |
| p73 (TP73)                         | Y99          | PN861      | O15350 | TP73   | 5285  | 130  | 2  | 5849  | 94   | 2  | 11 | 0.035 |
| PU.1                               | S146         | PN647      | P17947 | SPI1   | 1781  | 106  | 6  | 1976  | 161  | 8  | 11 | 0.038 |
| FAK (PTK2)                         | S722         | sc-16662-R | Q05397 | PTK2   | 3661  | 419  | 11 | 4064  | 482  | 12 | 11 | 0.035 |
| PPP2R4 (PP2A)                      | Y223         | PP550      | Q15257 | PTPA   | 10131 | 96   | 1  | 11281 | 357  | 3  | 11 | 0.042 |

|                                 |                    |        |            |         |       |      |    |       |      |    |    |       |
|---------------------------------|--------------------|--------|------------|---------|-------|------|----|-------|------|----|----|-------|
| subunit B';<br>PTPA)            |                    |        |            |         |       |      |    |       |      |    |    |       |
| PPPM1B<br>(PP2Cb;<br>PPM1B)     | Y367               | PP540  | O75688     | PPM1B   | 4732  | 402  | 9  | 5271  | 559  | 11 | 11 | 0.046 |
| ACTB<br>(beta-actin)            | Y53                | PN501  | P60709     | ACTB    | 3865  | 212  | 5  | 4357  | 89   | 2  | 13 | 0.036 |
| RSK1<br>(RPS6KA1;<br>p90RSK)    | S380               | PK805  | Q15418     | RPS6KA1 | 1520  | 176  | 12 | 1714  | 145  | 8  | 13 | 0.013 |
| PCTK2<br>(PCTAIRE<br>2; CDK17)) | S180               | PK756  | Q00537     | CDK17   | 5889  | 803  | 14 | 6646  | 825  | 12 | 13 | 0.016 |
| Tec                             | Y519               | PK829  | P42680     | TEC     | 847   | 38   | 5  | 960   | 61   | 6  | 13 | 0.041 |
| TERF1                           | T371               | PN675  | P54274     | TERF1   | 1211  | 169  | 14 | 1380  | 131  | 10 | 14 | 0.025 |
| Gab1                            | Y406               | PN516  | Q13480     | GAB1    | 1956  | 344  | 18 | 2238  | 430  | 19 | 14 | 0.043 |
| ATR                             | S435+S436          | PK528  | Q13535     | ATR     | 14817 | 1393 | 9  | 16973 | 1108 | 7  | 15 | 0.024 |
| Nek2                            | S171               | PK732  | P51955     | NEK2    | 13503 | 703  | 5  | 15538 | 1042 | 7  | 15 | 0.017 |
| UGDH                            | Y352               | PN782  | O60701     | UGDH    | 2910  | 238  | 8  | 3348  | 139  | 4  | 15 | 0.031 |
| Met (HGF<br>receptor)           | S1236              | PK705  | P08581     | MET     | 3216  | 86   | 3  | 3761  | 164  | 4  | 17 | 0.049 |
| MOR1 (mu<br>opiod<br>receptor)  | T372+S377+<br>T378 | PN802  | P35372     | OPRM1   | 4856  | 252  | 5  | 5786  | 88   | 2  | 19 | 0.020 |
| ARID1A                          | S363               | PN740  | O14497     | ARID1A  | 9211  | 866  | 9  | 11025 | 546  | 5  | 20 | 0.026 |
| BLNK                            | Y84                | 44-220 | Q8WV2<br>8 | BLNK    | 4451  | 749  | 17 | 5334  | 485  | 9  | 20 | 0.043 |
| PKN1<br>(PRK1)                  | T774               | PK781  | Q16512     | PKN1    | 3972  | 629  | 16 | 4813  | 407  | 8  | 21 | 0.034 |
| VACAMK<br>L                     | Y245               | PK892  | Q8NCB2     | CAMKV   | 541   | 45   | 8  | 671   | 71   | 11 | 24 | 0.020 |
| SMARCA4                         | S610+S613          | PN726  | P51532     | SMARCA4 | 1067  | 146  | 14 | 1327  | 96   | 7  | 24 | 0.019 |
| GATA3                           | S369               | PN702  | P23771     | GATA3   | 1914  | 141  | 7  | 2416  | 213  | 9  | 26 | 0.012 |
| VEGFR2<br>(KDR)                 | Y1059              | 11531  | P35968     | KDR     | 186   | 20   | 11 | 242   | 33   | 13 | 30 | 0.030 |
| TrkB<br>(NTRK2)                 | Y706+Y707          | PK917  | Q16620     | NTRK2   | 1708  | 65   | 4  | 2247  | 100  | 4  | 32 | 0.039 |
| AMPKa1<br>(PRKAA1)              | T183+S184          | PK521  | Q13131     | PRKAA1  | 4926  | 499  | 10 | 6566  | 564  | 9  | 33 | 0.039 |
| TAO1<br>(TAOK1)                 | S181               | PK826  | Q7L7X3     | TAOK1   | 262   | 17   | 6  | 419   | 50   | 12 | 60 | 0.023 |
